# Supplementary material
Source: PubMed Central journal article supplement (PMC4249944)
Supplement: NIHMS632229-supplement-1.pdf [file NIHMS632229-supplement-1.pdf]

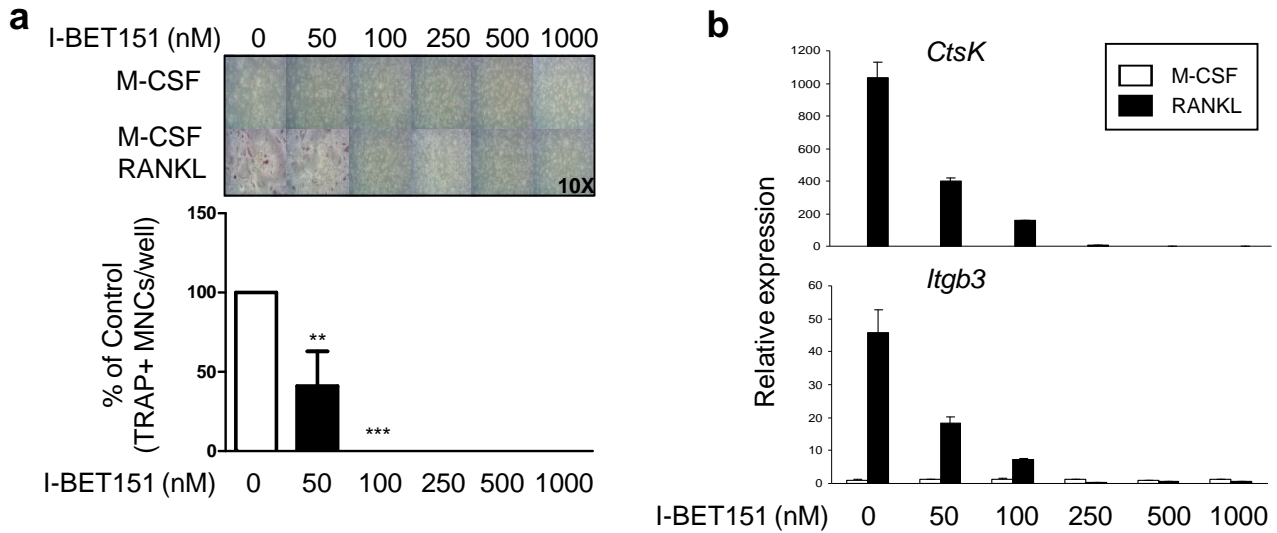

**Supplementary Figure 1. I-BET151 inhibits murine osteoclastogenesis. a.** Mouse bone marrow cells from C57BL/6 mice were cultured with M-CSF (20 ng ml<sup>-1</sup>) for 4 days and then exposed to either DMSO (vehicle control, labeled 0) or I-BET151 at the indicated doses. After 1hr, RANKL (100 ng ml<sup>-1</sup>) was added, and TRAP-positive multinucleated (more than three nuclei) cells were counted 5 days after RANKL addition. The number of osteoclasts in control conditions is set as 100%. *Upper panel*, Representative results obtained from one out of more than three experiments are shown. *Lower panel*, Data are shown as means  $\pm$  SEM from three independent experiments. \*\* : $P < 0.01$ , \*\*\* : $P < 0.001$  by One-way ANOVA. **b.** Cells were cultured as in **a**, and mRNA was measured using real-time PCR. mRNA levels were normalized relative to the expression of GAPDH mRNA. Representative results from at least three independent experiments are shown.

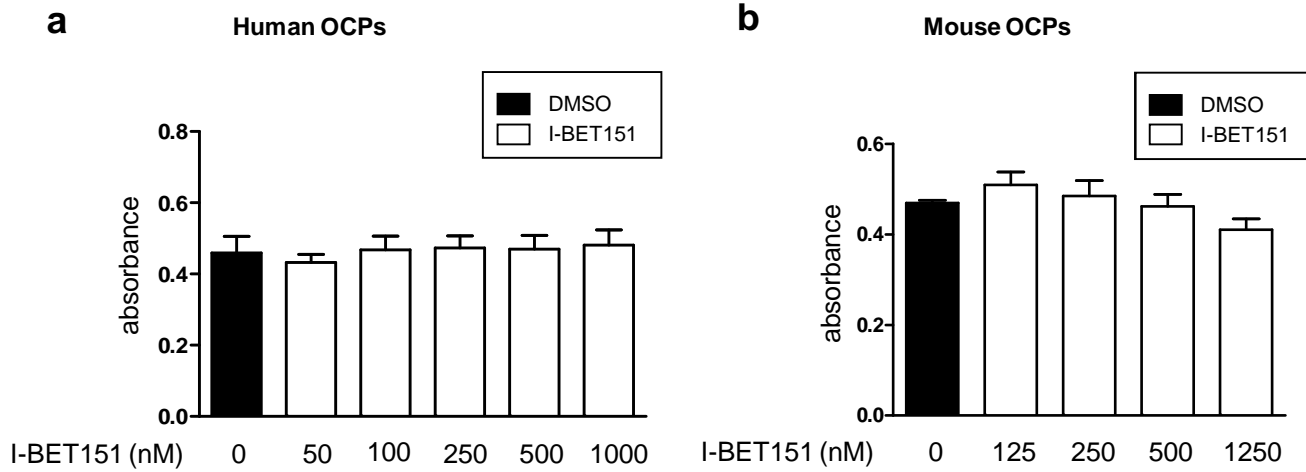

**Supplementary Figure 2. Effect of I-BET151 on cell survival.** Either human OCPs (**a**, CD14<sup>+</sup> monocytes cultured overnight with M-CSF (20 ng ml<sup>-1</sup>)) or mouse OCPs (**b**, bone marrow cells cultured with M-CSF for four days) were cultured with either DMSO (black bars) or I-BET151 (white bars) at the indicated doses for six days and then cell viability was measured using the MTT assay kit (Roche). Absorbances (A590-A690) are shown as means  $\pm$  SEM from four independent experiments with human OCPs and five independent experiments with mouse OCPs.

### Supplementary Figure 3

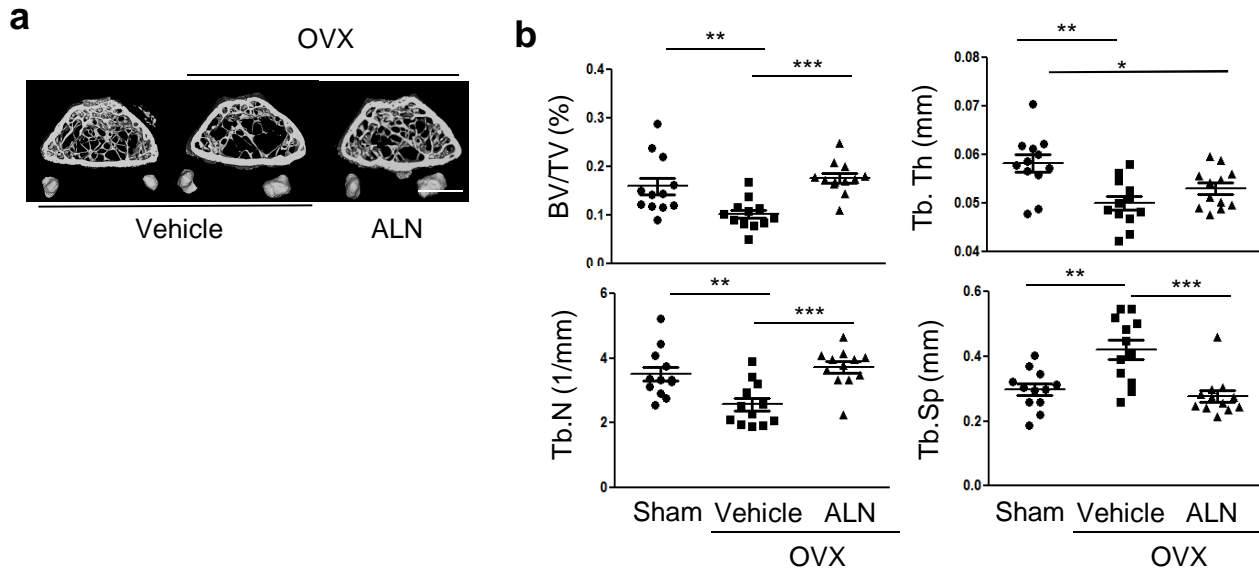

**Supplementary Figure 3. Alendronate increases bone mass in the post-OVX model of osteoporosis.** The effects of alendronate (ALN, n=12) in the OVX-induced bone loss model were tested in parallel to the effects of I-BET151 in the same experiment as shown in Fig. 2; thus, the control data for sham-operated mice (Sham) and ovariectomized mice (OVX) are the same in Fig. 2 and Supplementary Figure 3. **a.** Representative images showing trabecular architecture by micro-computed tomography ( $\mu$ CT) reconstruction in the distal femurs. Scale bars, 1 mm. **b.**  $\mu$ CT measurements for the indicated parameters in distal femurs. Bone volume (BV TV<sup>-1</sup>), trabecular space (Tb.Sp.), trabecular number (Tb.N.) and trabecular thickness (Tb.Th.) were determined by  $\mu$ CT analysis. All data are shown as mean  $\pm$  SEM \*  $P < 0.05$ , \*\*  $P < 0.01$ , \*\*\*  $P < 0.001$ . One-way ANOVA with a posthoc Tukey test was performed.

## Supplementary Figure 4

**a**

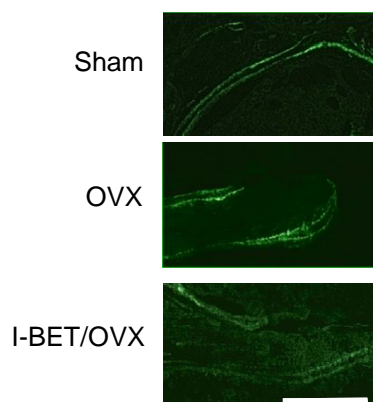

**b**

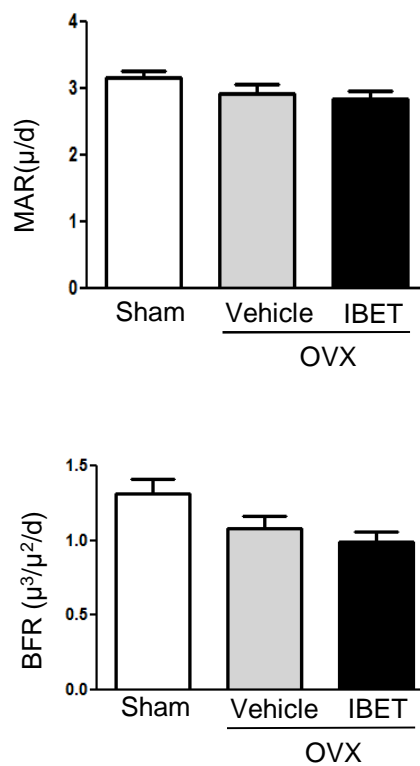

**Supplementary Figure 4. I-BET151 did not significantly suppress bone formation in the post-ovariectomy model.** **a.** Representative images showing casein double labeling in trabecular bone. Scale bars 100  $\mu\text{m}$ . **b.** Bone formation parameters including mineral apposition rate (MAR) and bone formation rate (BFR) were measured in sham-operated mice (Sham), ovariectomized mice (OVX) and I-BET 151 treated group (IBET/OVX) ( $n=6$ ). All data are shown as mean  $\pm$  SEM and the statistical analysis (One-way ANOVA) showed no significant difference among groups.

**a**

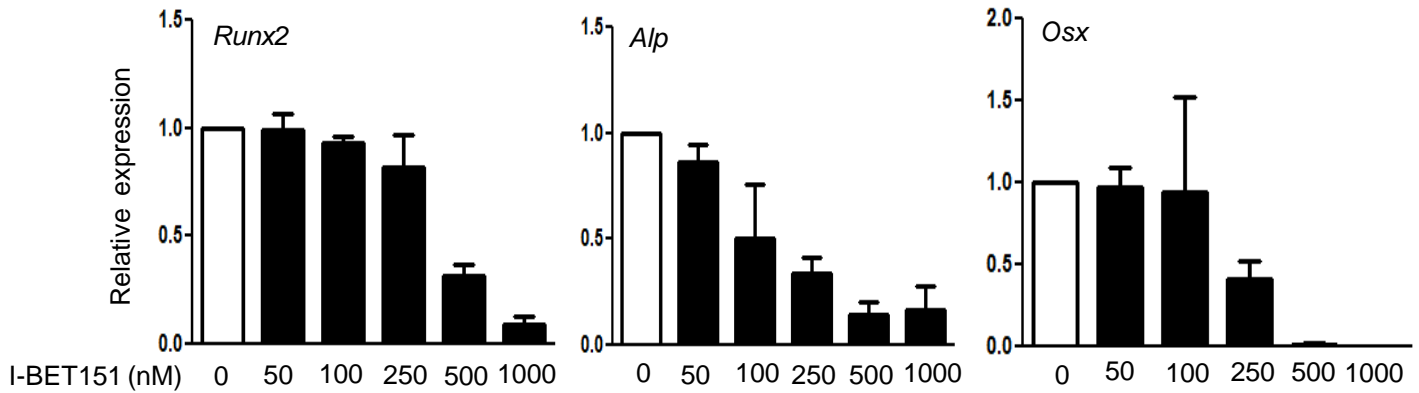

**b**

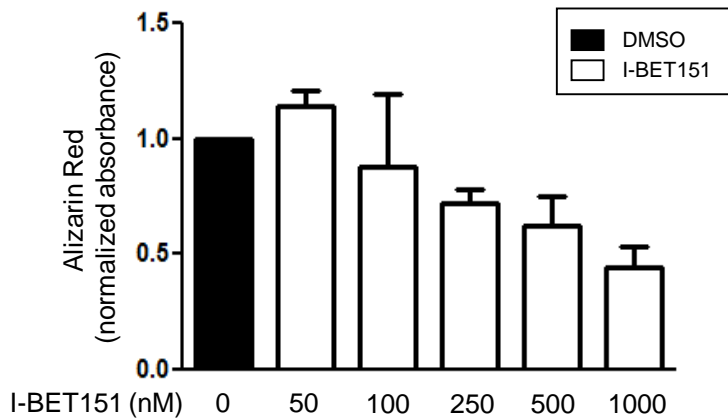

**Supplementary Figure 5. The dose-dependent effect of I-BET151 on osteoblast cultures.** Primary osteoblasts were isolated from calvariae and cultured with  $\alpha$ -MEM containing 10% FBS, 50  $\mu\text{g ml}^{-1}$  of ascorbic acid, and 8 mM beta-glycerophosphate. Cells were treated with either DMSO or I-BET151 at the indicated doses from the beginning of the culture. **a.** mRNA was measured using real-time PCR at day 10. mRNA levels were normalized relative to the expression of GAPDH and results are shown as mean  $\pm$  SEM from two independent experiments. **b.** Alizarin Red Staining of mineralizing osteoblast cells. Values were normalized relative to control cells treated with vehicle control DMSO. All data are shown as mean  $\pm$  SEM from two independent experiments.

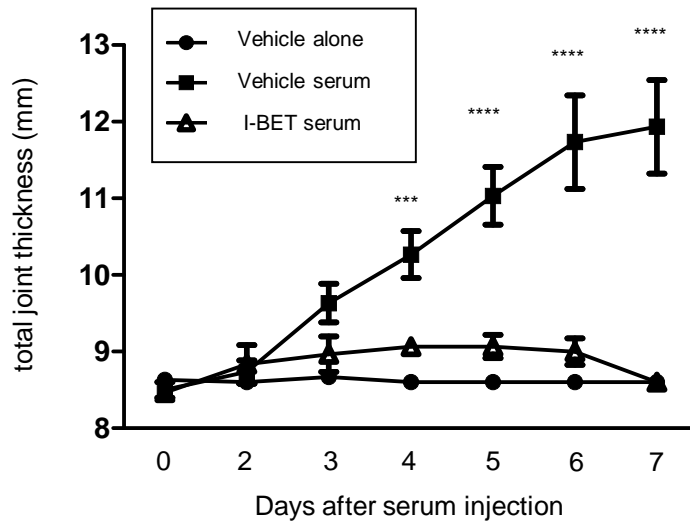

**Supplementary Figure 6. I-BET151 nearly completely suppresses K/BxN arthritis induced by suboptimal amounts of serum.** Arthritis was induced in C57BL/6 mice as described in Methods, except that a low potency arthritogenic serum was used. Under these conditions, where arthritis in the control serum-treated group was milder than that shown in Fig. 3, only minimal arthritis occurred in the I-BET151-treated group. Shown is the time course of arthritis development in the presence and absence of I-BET151 treatment. Values are the mean  $\pm$  SEM of 3 mice per group. \*\*\*:  $P < 0.001$ ; \*\*\*\*:  $P < 0.0001$  by two-way ANOVA.

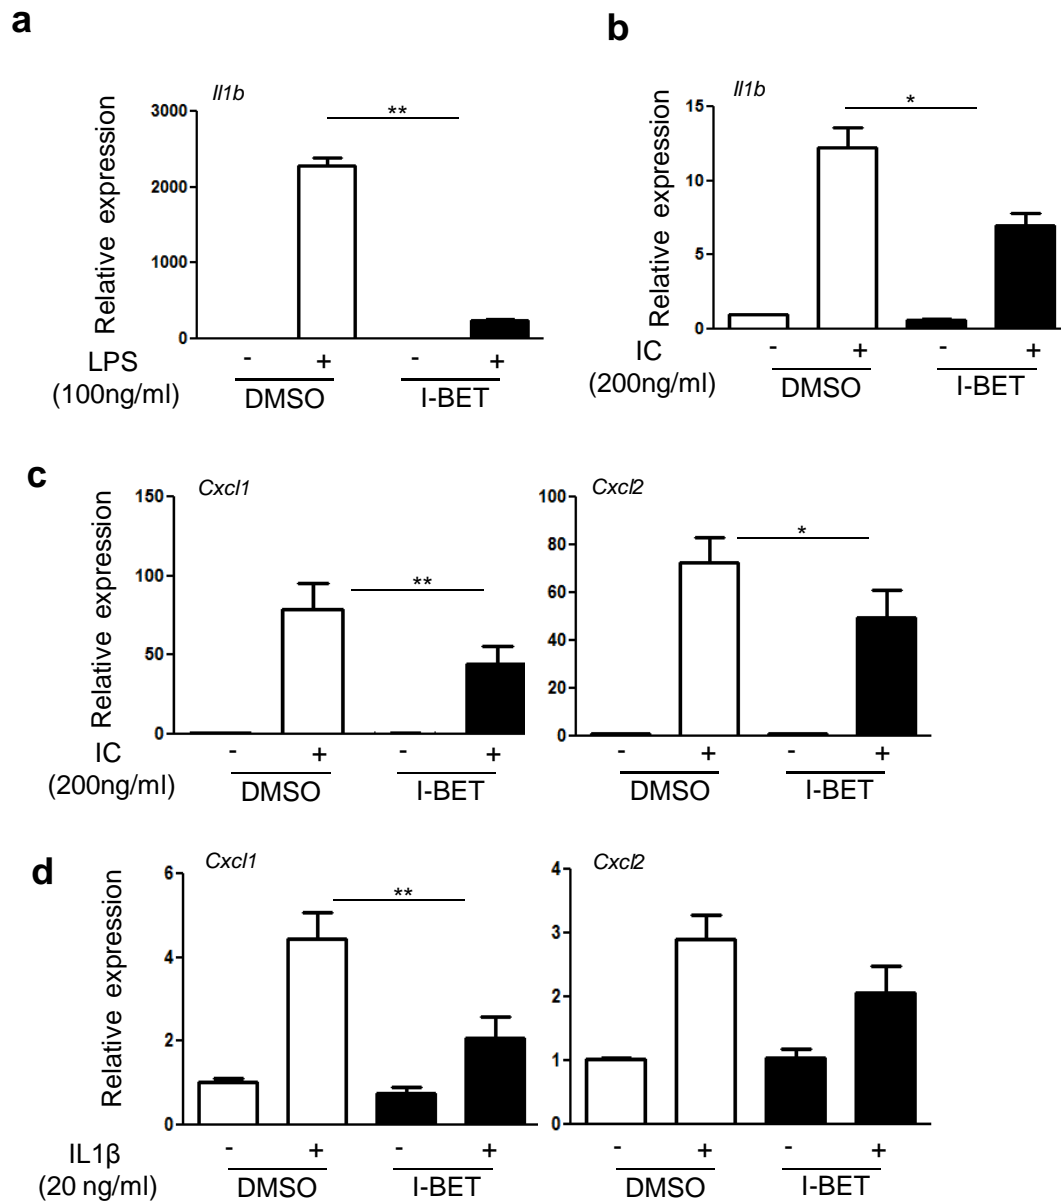

**Supplementary Figure 7. I-BET151 suppresses induction of IL-1 by inflammatory stimuli and attenuates immune complex- and IL-1-induced expression of neutrophil chemoattractants.** Mouse OCPs were treated with DMSO or I-BET151 (500 nM) for 1hr prior to stimulation with inflammatory stimuli. **a.** Cells were stimulated with LPS (**a**, 100 ng ml<sup>-1</sup>) for 6 hrs. **b-d.** Cells were stimulated with immune complexes (IC; 200 ng ml<sup>-1</sup>) that were formed by incubation of anti-DNP with DNP-albumin (**b, c**), or murine IL-1β (**d**, 20 ng/ml) for 3 hrs. mRNA was measured using real-time PCR. mRNA levels were normalized to the expression of GAPDH, and results are shown as means ± SEM from three experiments. \* :*P* < 0.05, \*\* :*P* < 0.01 by *t*-test.

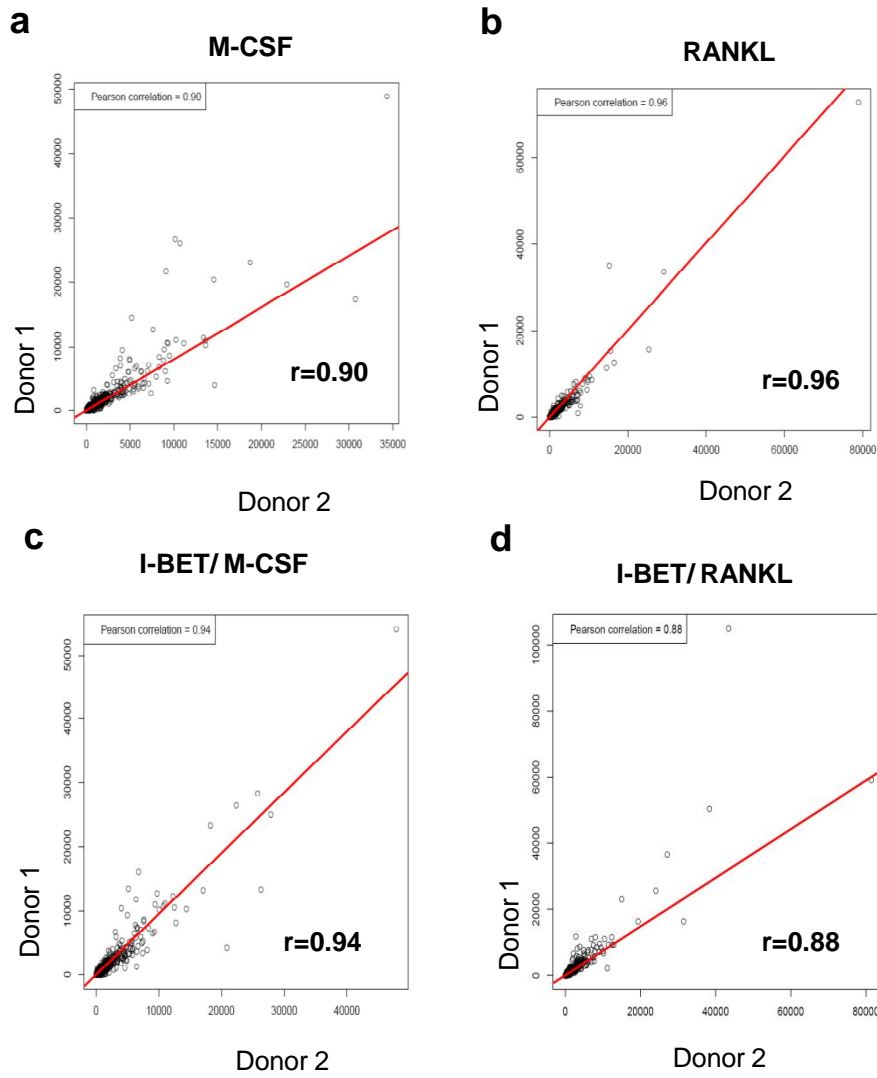

**Supplementary Figure 8. Pearson correlation analysis of RNAseq data obtained using OCPs from two independent donors.** Human OCPs (CD14+ monocytes cultured overnight with M-CSF (20 ng ml<sup>-1</sup>)) were treated with DMSO (vehicle control, labeled 0) or I-BET151 (250nM) for 1hr prior to addition of RANKL (40 ng ml<sup>-1</sup>). Cells were incubated with RANKL for one day. **a-d**, The scatter plot diagrams show Pearson correlation analysis of gene expression profiles of human OCPs between two independent donors. The red lines in the scatter plots show the linear model trend line of the data. The first donor is plotted on the Y-axis and the second donor on the X-axis. The respective correlation coefficient values are reported in each plot. Pearson correlation coefficients were > 0.88, showing similarity of gene expression in biological replicates.



**a Molecular and Cellular Function**

| Name                                   | p-value             | # of molecules |
|----------------------------------------|---------------------|----------------|
| Cell Cycle                             | 1.58E-22 - 3.54E-03 | 118            |
| Cellular Assembly and Organization     | 7.43E-19 - 3.05E-03 | 107            |
| DNA Replication, Recombination, Repair | 7.43E-19 - 3.21E-03 | 111            |
| Cellular Development                   | 2.61E-11 - 3.41E-03 | 110            |
| Cellular Growth and Proliferation      | 2.61E-11 - 3.14E-03 | 154            |

**b Top canonical pathway**

| Name                                                  | p-value  | Ratio |
|-------------------------------------------------------|----------|-------|
| Estrogen-mediated S-phase Entry                       | 1.54E-09 | 0.321 |
| Cell Cycle Control of Chromosomal Replication         | 7.48E-09 | 0.265 |
| Cyclins and Cell Cycle Regulation                     | 3.1E-08  | 0.135 |
| Mitotic Roles of Polo-like Kinase                     | 3.24E-07 | 0.149 |
| Role of CHK Proteins in Cell Cycle Checkpoint Control | 4.16E-07 | 0.169 |

**Supplementary Figure 9. Analysis of RNAseq data: Gene ontology (GO) analysis of 465 RANKL-induced genes which I-BET151 suppressed by > 50% in two independent donors.** To gain insight into mechanisms by which I-BET151 suppressed osteoclastogenesis, we analyzed RANKL-induced genes whose expression was inhibited >50% by I-BET151 (in other words, I-BET151 targets) (listed in Supplementary Table 1). Visual inspection of the I-BET target gene list was followed by pathway and gene ontology (GO) analysis using Ingenuity Pathway Analysis (IPA, Ingenuity Systems, Redwood City, CA) and also the Molecular Signature Database available at the Broad Institute website [www.broadinstitute.org/gsea](http://www.broadinstitute.org/gsea). Consistent with the 24 hr time point of RANKL stimulation, which is early during the 5-6 day osteoclast differentiation process and precedes expression of many canonical osteoclast marker genes, osteoclast-related genes were not enriched among the I-BET targets (as these genes were not yet expressed in response to RANKL stimulation). In accordance with results shown in Supplemental Fig. 13, genes encoding components of osteoclast inducing pathways such as NF- $\kappa$ B or MAPK-AP-1 were not enriched. In contrast, GO analysis of molecular cellular function (**a**) and canonical pathways (**b**) using IPA showed highly significant enrichment of genes important in fundamental cellular processes such as cell cycle regulation, cell proliferation, and DNA replication and repair. GO analysis using the Molecular Signatures Database showed similar results (data not shown). These results are consistent with the known functions in cell cycle and proliferation of MYC and its inhibition by I-BET151, although the role of MYC and cell cycle regulators in these post-mitotic nonproliferating human OCPs needs to be further clarified.

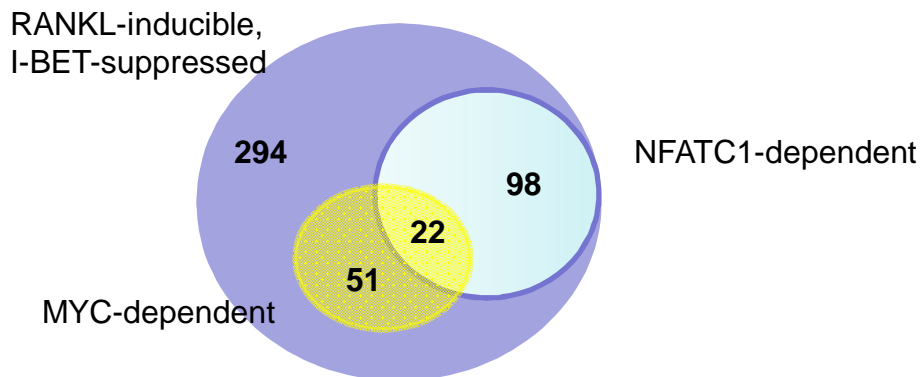

**Supplementary Figure 10. Transcriptome-wide analysis reveals that I-BET151 suppresses RANKL-induced expression of MYC and NFAT target genes.** We extended our analysis to ask whether the 465 I-BET targets were enriched in genes that are regulated by transcription factors important for osteoclastogenesis. Strikingly, 120 of 465 (26%) of I-BET targets correspond to NFATc1 target genes (GSE37219) <sup>2</sup> (shaded light blue in Venn diagram, listed in Supplementary Table 2). IPA analysis showed that 73 out of 465 (16%) of I-BET targets correspond to MYC target genes (shaded yellow in Venn diagram), which corroborates the results shown above. These results confirm that I-BET inhibits MYC in OCPs, and suggest that a major effect of I-BET is suppression of NFATc1 and expression of its target genes that play a key role in osteoclastogenesis.

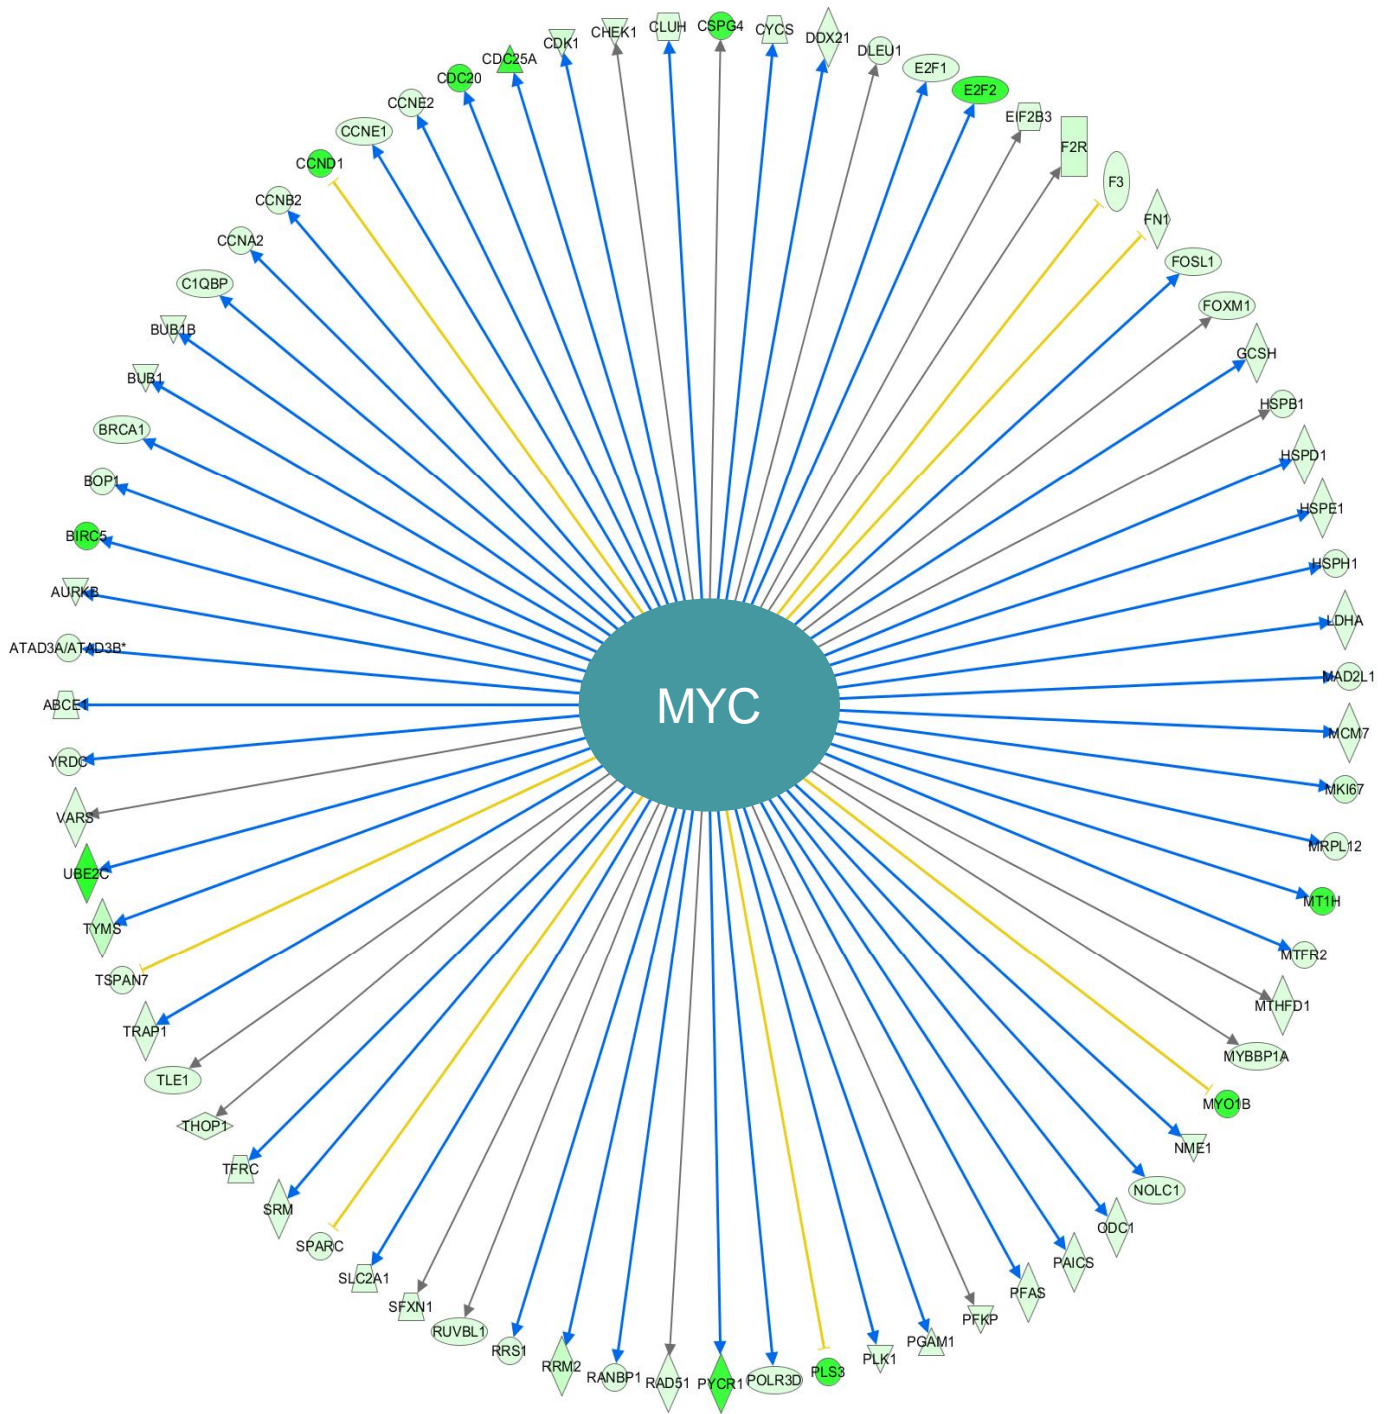

**Supplementary Figure 11. MYC target gene network suppressed by I-BET151 in RANKL-stimulated OCPs.** Results of IPA upstream regulator analysis that identified MYC as a regulator of I-BET151 targets are shown. Dark green: genes highly suppressed by IBET151; light green: genes less suppressed by IBET151. The arrows depict predicted relationships of MYC and target genes: blue arrows denote genes induced by MYC and yellow arrows denote genes regulated by MYC in a context-dependent manner.

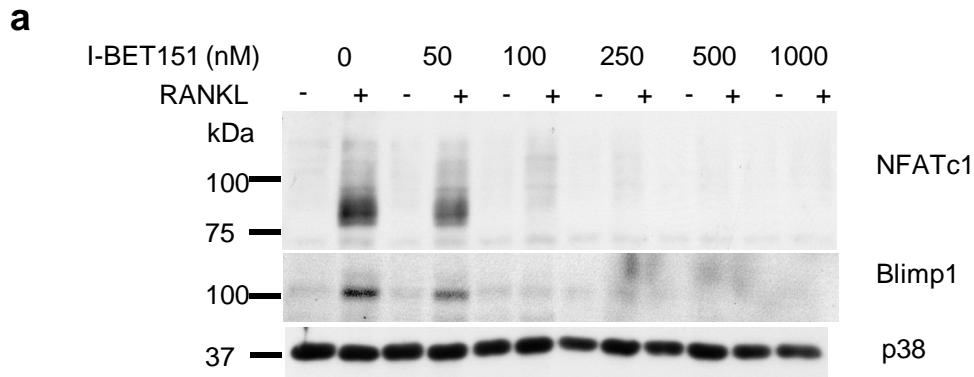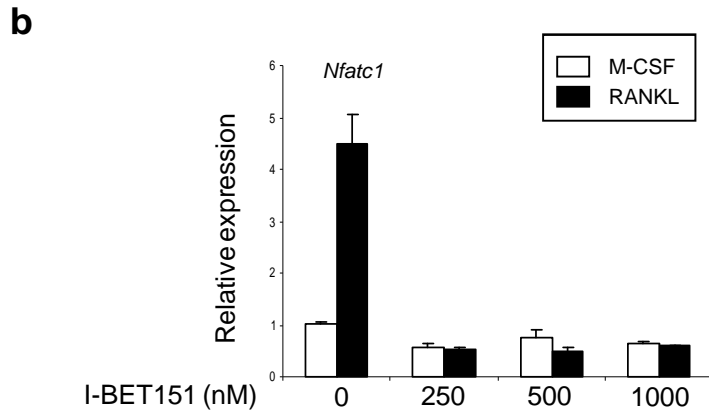

**Supplementary Figure 12. I-BET151 suppresses RANKL-induced NFATc1 expression in mouse OCPs.** Mouse bone marrow cells from C57BL/6 mice were cultured with M-CSF (20 ng ml<sup>-1</sup>) for 4 days and then exposed to either DMSO (vehicle control, labeled 0) or I-BET151 at the indicated doses. After 1hr, RANKL (100 ng ml<sup>-1</sup>) was added and cells were cultured with RANKL for two additional days. **a.** Whole-cell lysates were immunoblotted with NFATc1, Blimp1 and p38 antibodies. Images have been cropped for presentation; full size blots are shown in Supplementary Figure 18. **b.** mRNA was measured using real-time PCR. mRNA levels were normalized to the expression of GAPDH, and results are shown as means  $\pm$  SD of triplicate determinants. The results are from more than three experiments.

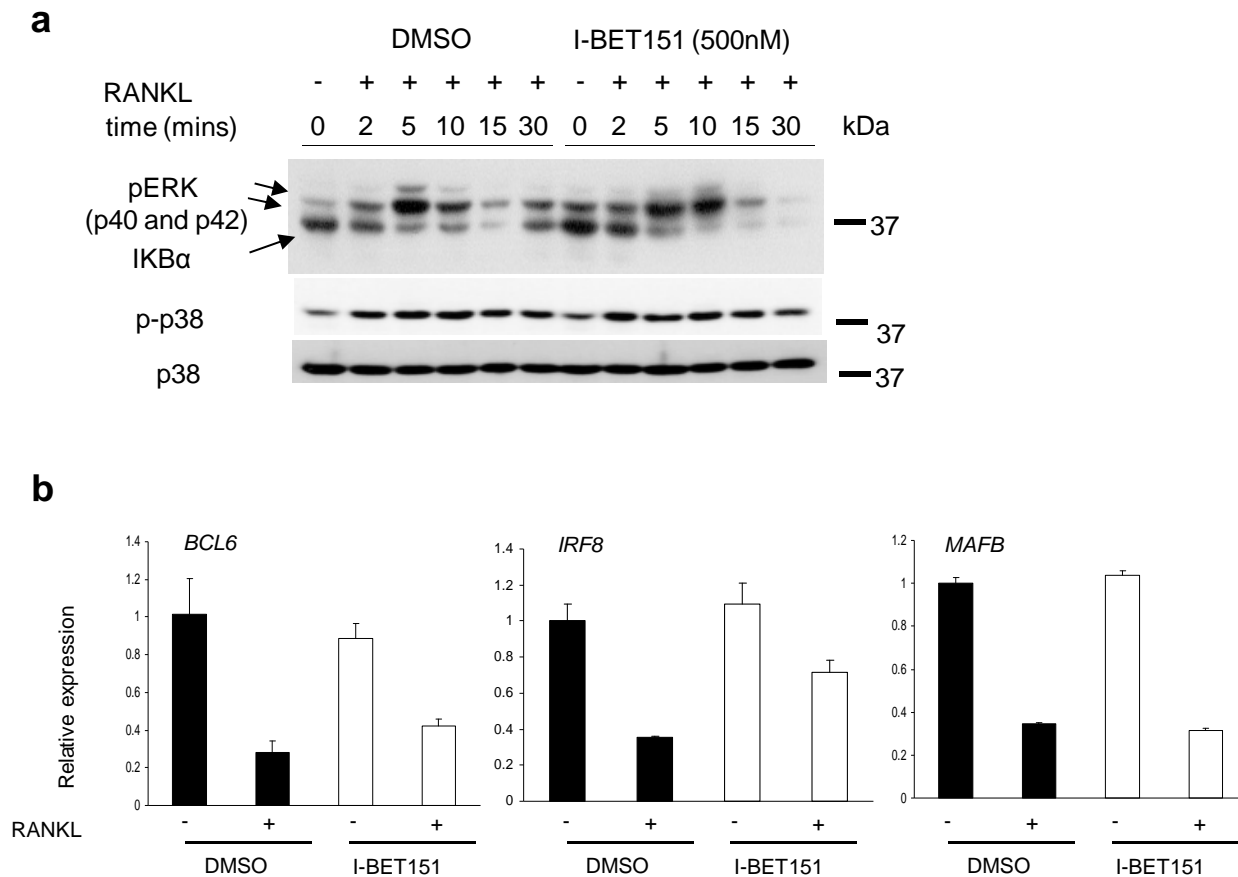

**Supplementary Figure 13. I-BET151 minimally regulates proximal RANKL signaling pathways and RANKL-induced suppression of transcriptional repressors.** Human OCPs were generated and then cultured in the presence or absence of I-BET151 (500nM) for 1 hr. **a.** OCPs were then stimulated with RANKL (100 ng ml<sup>-1</sup>) for the indicated times. Whole-cell lysates were subjected to immunoblotting with the indicated antibodies. Images have been cropped for presentation; full size blots are shown in Supplementary Figure 18. **b.** OCPs were cultured with RANKL (40 ng ml<sup>-1</sup>) for two additional days. mRNA levels of known repressors of osteoclastogenesis, BCL6, IRF8, and MAF-B, were measured using real-time PCR. RANKL stimulation resulted in the expected decreases in BCL6, IRF8 and MAF-B mRNA level. These decreases were not effectively reversed by I-BET151, suggesting that I-BET151 does not work by increasing expression of negative regulators of osteoclastogenesis. mRNA levels were normalized to the expression of GAPDH mRNA, and results are shown as means  $\pm$  SD of triplicate determinants.

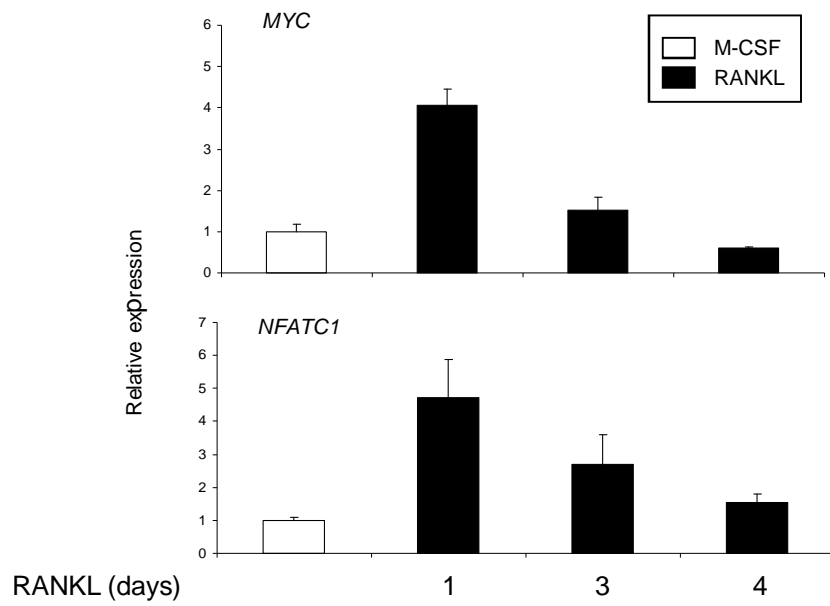

**Supplementary Figure 14. Time course analysis of *MYC* and *NFATC1* expression in human OCPs.** Human monocytes were cultured with M-CSF (20 ng ml<sup>-1</sup>) for 1 day, and RANKL (40 ng ml<sup>-1</sup>) was then added for the indicated times. mRNA was measured using real-time PCR. mRNA levels were normalized to the expression of GAPDH mRNA, and results are shown as means  $\pm$  SD of triplicate determinants.

### Mouse OCPs

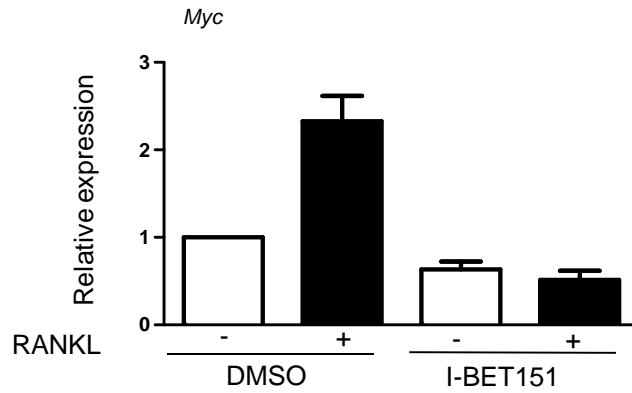

**Supplementary Figure 15. I-BET151 suppresses RANKL-induced *Myc* expression in mouse OCPs.** Mouse bone marrow cells from C57BL/6 mice were cultured with M-CSF (20 ng ml<sup>-1</sup>) for 4 days and then exposed to either DMSO (vehicle control) or I-BET151 (500 nM). After 1hr, RANKL (100 ng ml<sup>-1</sup>) was added, and cells were cultured with RANKL for two days. *Myc* mRNA was measured using real-time PCR. mRNA levels were normalized to the expression of GAPDH mRNA. Data are shown as means ± SEM from three independent experiments.

## Mouse OCPs

**a**

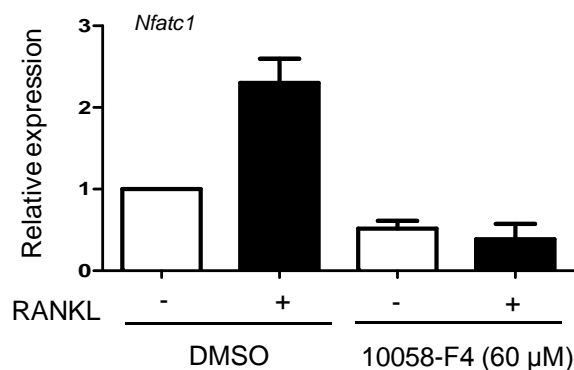

**b**

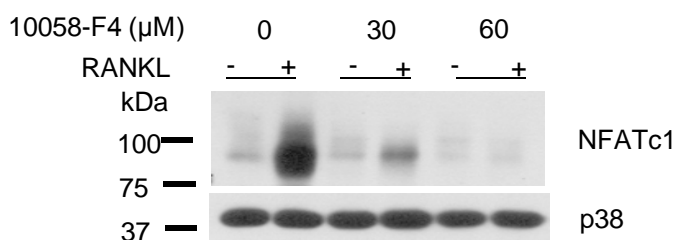

**Supplementary Figure 16. A MYC inhibitor, 10058-F4, suppresses RANKL-induced NFATc1 expression in mouse OCPs.** Mouse bone marrow cells from C57BL/6 mice were cultured with M-CSF (20 ng ml<sup>-1</sup>) for 4 days and then exposed to either DMSO (vehicle control) or 10058-F4 at the indicated doses. After 1hr, RANKL (100 ng ml<sup>-1</sup>) was added, and cells were cultured with RANKL for two days. **a.** *Nfatc1* mRNA was measured using real-time PCR. mRNA levels were normalized to the expression of GAPDH mRNA. **b.** Whole-cell lysates were immunoblotted with NFATc1 and p38 antibodies. Images have been cropped for presentation; full size blots are shown in Supplementary Figure 18.



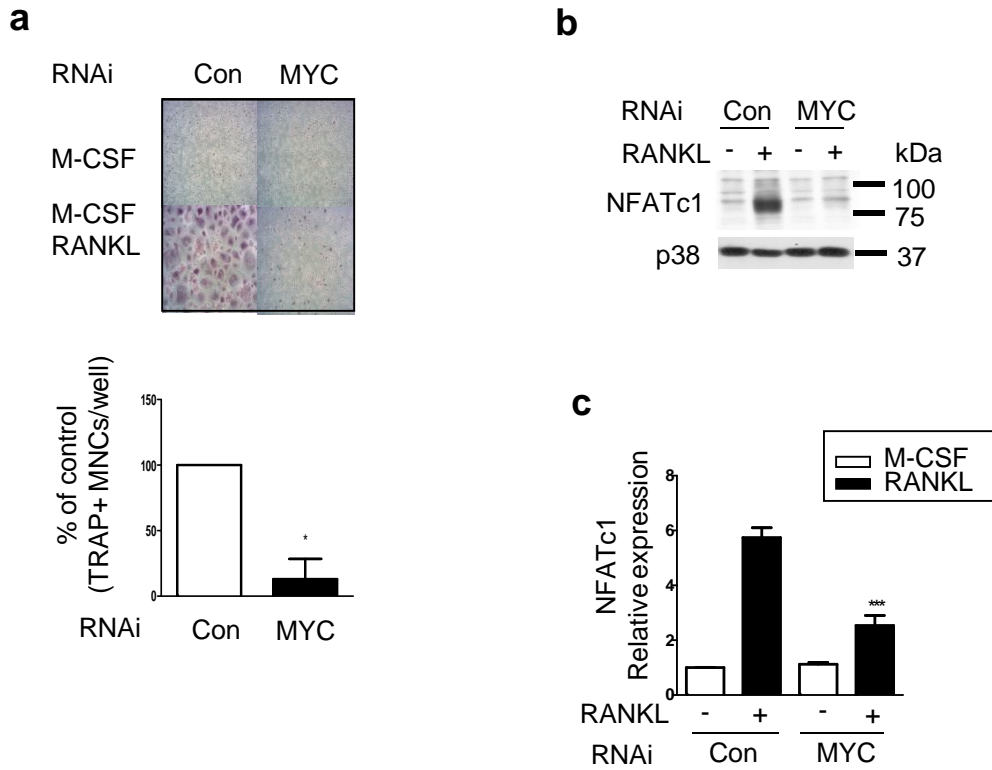

**Supplementary Figure 17. MYC plays an important role in osteoclastogenesis.** Human monocytes were nucleofected with control or MYC-specific small interfering RNAs (siRNAs). **a.** Osteoclastogenesis assay. TRAP-positive, multinucleated osteoclast formation was visualized by TRAP staining. *Upper panel*, Representative results obtained from one donor are shown. *Lower panel*, Data are shown as mean  $\pm$  SEM from four independent donors. The number of osteoclasts obtained using control siRNA for each donor is set as 100%. Data are shown as means  $\pm$  SEM from three independent experiments. \* : $P < 0.05$  by One-way ANOVA. **b.** Immunoblot of NFATc1 and p38 expression in human OCPs after 2 days of RANKL treatment. Images have been cropped for presentation; full size blots are shown in Supplementary Figure 18. **c.** NFATc1 mRNA was measured using real-time PCR. mRNA levels were normalized to the expression of GAPDH. , Data are shown as means  $\pm$  SEM from three independent experiments. \*\*\* : $P < 0.001$  by One-way ANOVA.

Fig 4c

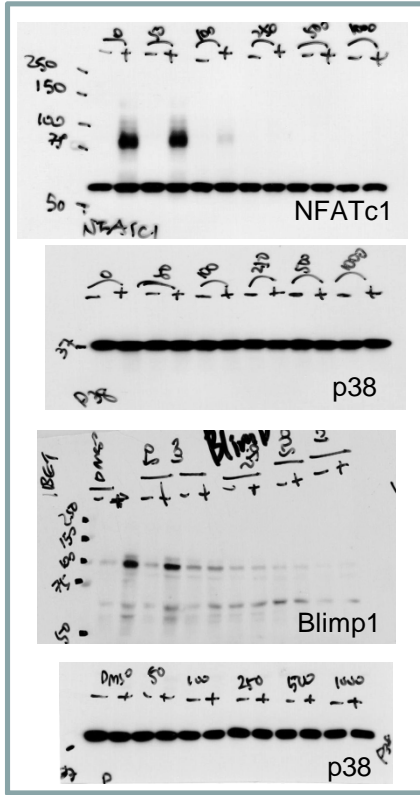

Fig 5c

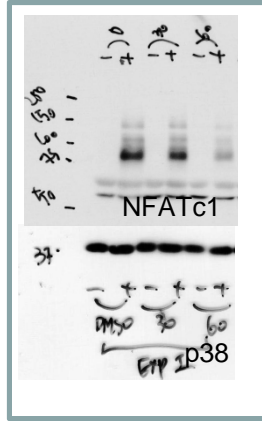

Supplementary Fig .12a

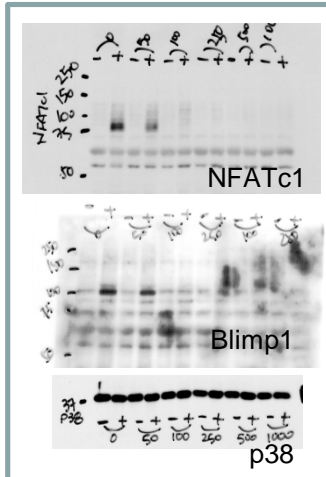

Supplementary Fig .13a

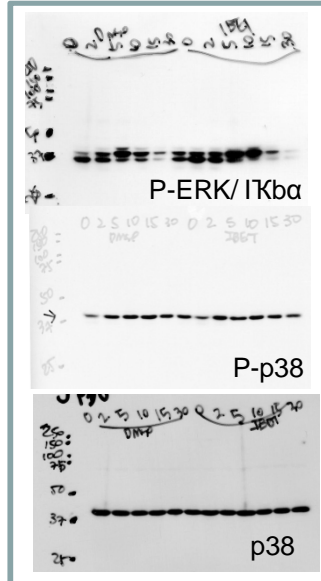

Supplementary Fig .16b

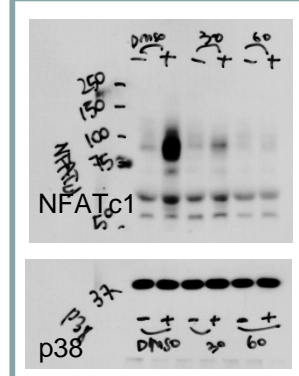

Supplementary Fig .17b

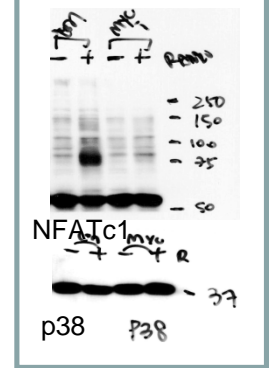

**Supplementary Figure 18.** Full blot images of the figures and supplementary figures used in this paper. After transferring proteins into the membrane, the membrane is splitted between 50 kDa and 37kDa. Lower part of the membrane is blotted with p38 antibody.

## Supplementary Table 1.

Genes were induced by RANKL (>2fold) and inhibited by I-BET (>2 fold): 465 genes

|          |          |           |              |            |          |        |
|----------|----------|-----------|--------------|------------|----------|--------|
| ABCE1    | CENPA    | FILIP1L   | LIF          | SHANK3     | PA2G4P4  | UST    |
| ACAD11   | CENPF    | FJX1      | LOC100128191 | SHCBP1     | PAC3IN3  | UTP20  |
| ADAMDEC1 | CENPH    | FKBP11    | LOC100128881 | SHPK       | PAICS    | VARS   |
| ADAMTS14 | CENPI    | FKBP4     | LOC100289511 | SIGLEC15   | PAM16    | WDHD1  |
| ADAMTS2  | CENPK    | FLNB      | LOC100506054 | SIK1       | PAQR5    | WDR12  |
| AEN      | CENPM    | FN1       | LOC729080    | SIX5       | PDCD1LG2 | WDR34  |
| AFAP1    | CEP55    | FNBP1L    | LOXL2        | SKA1       | PDF      | WDR4   |
| AK4      | CHAF1B   | FOSL1     | LTBP2        | SKA3       | PDSS1    | WDR76  |
| AK8      | CHCHD4   | FOSL2     | LTV1         | SLC25A15   | PEMT     | WEE1   |
| ALDH1B1  | CHEK1    | FOXM1     | MAD2L1       | SLC25A22   | PFAS     | WWC1   |
| ALG1L    | CHPF     | FUT7      | MANEAL       | SLC25A23   | PFKP     | YRDC   |
| ALKBH2   | CKAP2L   | FXN       | MAOA         | SLC27A5    | PGAM1    | ZDHHC9 |
| ALS2CL   | CKB      | GAL       | MARS2        | SLC2A1     | PGAM4    | ZNF366 |
| ANLN     | CKS1B    | GALNT14   | MATK         | SLC35E4    | PHF17    | ZNF367 |
| APOBEC3B | CLCF1    | GCSH      | MCM10        | SLC35F2    | PHLDA2   | ZNF462 |
| ARHGAP23 | CLSPN    | GINS2     | MCM2         | SLC35G1    | PHLDA3   | ZWINT  |
| ARNT2    | COL18A1  | GINS3     | MCM3         | SLC38A5    | PIGW     |        |
| ATAD2    | COL27A1  | GLB1L2    | MCM4         | SLC39A14   | PKIA     |        |
| ATAD3A   | COL6A2   | GMPR      | MCM7         | SLC39A8    | PKN3     |        |
| ATAD3B   | COQ3     | GNPNAT1   | MELK         | SLC43A3    | PLEKHF1  |        |
| ATIC     | CSPG4    | GOLM1     | METRNL       | SLC7A1     | PLK1     |        |
| ATP6V0D2 | CTPS     | GPATCH4   | METTL1       | SLC9B2     | PLK4     |        |
| AURKAPS1 | CTTN     | GPR125    | MGST1        | SLCO4A1    | PLS3     |        |
| AURKB    | CXCL5    | GREM1     | MKI67        | SPAG5      | PODXL2   |        |
| B4GALT2  | CYCS     | GRPR      | MLLT11       | SPARC      | POLE2    |        |
| BAHCC1   | CYP27B1  | GSG2      | MMACHC       | SPC24      | POLO     |        |
| BAMBI    | DCTPP1   | GTPBP4    | MND1         | SPC25      | POLR1A   |        |
| BCAR1    | DDX21    | GTSE1     | MNS1         | SPHK1      | POLR3D   |        |
| BCL7A    | DEPDC1B  | GXYLT2    | MPP6         | SRM        | POLR3G   |        |
| BHLHE40  | DHODH    | HELLS     | MRGPRF       | ST18       | POLR3K   |        |
| BIRC5    | DIAPH3   | HIC1      | MRPL1        | ST6GALNAC4 | PPARGC1B |        |
| BOLA3    | DIXDC1   | HJURP     | MRPL12       | STAMBPL1   | PPM1J    |        |
| BOP1     | DLAT     | HMMMR     | MRPL24       | STEAP1     | PPP1R14B |        |
| BRCA1    | DLEU1    | HPDL      | MRPL3        | STEAP3     | PPYR1    |        |
| BRX1     | DLGAP5   | HSP90AB4P | MRPL4        | STIL       | PRC1     |        |
| BUB1     | DMPK     | HSPB1     | MRPL46       | STRADB     | PRIM1    |        |
| BUB1B    | DNA2     | HSPD1     | MRT04        | SULT1B1    | PRKCH    |        |
| BYSL     | DOT1L    | HSPE1     | MT1H         | SUPT3H     | PROCR    |        |
| C10orf2  | DPH2     | HSPG2     | MTFP1        | TANC2      | PTK2     |        |
| C11orf82 | DPP4     | HSPH1     | MTHFD1       | TBC1D4     | PTPN22   |        |
| C12orf23 | DSCC1    | HTRA3     | MTHFD1L      | TEX10      | PTRF     |        |
| C14orf34 | DTL      | HYAL1     | MYBBP1A      | TFRC       | PVT1     |        |
| C16orf59 | E2F1     | IARS      | MYBL2        | TGFB3      | PYCR1    |        |
| C17orf53 | E2F2     | IFI27     | MYC          | THOP1      | PYCR1    |        |
| C1orf198 | E2F8     | IFRD2     | MYEOV        | TIMM17A    | RAB38    |        |
| C1orf21  | EBNA1BP2 | IGFBP6    | MYO10        | TIPIN      | RAC3     |        |
| C1orf226 | EFCAB4B  | IGSF10    | MYO19        | TK1        | RAD51    |        |
| C1QBP    | EHD2     | IL15RA    | MYO1B        | TLE1       | RAD54B   |        |
| C7orf74  | EIF2B3   | IL1R2     | NAP1L5       | TMEM158    | RAI14    |        |
| C9orf140 | ELOVL6   | IL7R      | NAT14        | TMEM237    | RANBP1   |        |
| C9orf30  | ENO3     | ILDR1     | NAV2         | TMX2       | RBFA     |        |
| C9orf41  | EPT1     | IMP4      | NCAPG        | TNFRSF12A  | RBFOX2   |        |
| CA2      | ESCO2    | IPO4      | NCAPH        | TNFRSF6B   | RBP5     |        |
| CCDC34   | ESYT3    | ISOC2     | NCS1         | TOMM34     | RECQL4   |        |
| CCDC86   | EXO1     | ITGA11    | NDC80        | TOMM40     | RFC3     |        |
| CCL24    | EXOSC5   | ITGB3     | NDIFP2       | TOP2A      | RFX8     |        |
| CCL7     | EXT1     | ITPR1     | NDUFS8       | TPX2       | RGS16    |        |
| CCNA2    | F2R      | JDP2      | NFATC1       | TRAK2      | RM12     |        |
| CCNB2    | F3       | KANK1     | NLE1         | TRAP1      | RNF208   |        |
| CCND1    | F5       | KIAA0020  | NME1         | TRIP13     | RRAD     |        |
| CCNE1    | FAIM     | KIAA0040  | NME1-NME2    | TRMT61A    | RRM2     |        |
| CCNE2    | FAM108C1 | KIAA0101  | NOLC1        | TROAP      | RRP12    |        |
| CD109    | FAM109A  | KIAA0664  | NOP16        | TSPAN7     | RRS1     |        |
| CDC20    | FAM111B  | KIAA1161  | NOS1AP       | TSR1       | RUVBL1   |        |
| CDC25A   | FAM1134B | KIF11     | NOV          | TTC4       | S100A2   |        |
| CDC42EP1 | FAM119A3 | KIF18B    | NPM3         | TTK        | S100A3   |        |
| CDC42EP5 | FAM119A4 | KIF20A    | NRIP3        | TUBA8      | SCFD2    |        |
| CDC45    | FAM40B   | KIF23     | NUDT8        | TXLNB      | SCG5     |        |
| CDC6     | FAM54A   | KIF2C     | NUF2         | TYMS       | SCML2    |        |
| CDCA3    | FAM86C2P | KIFC1     | ODC1         | UBE2C      | SDC1     |        |
| CDCA5    | FANCA    | LAPTM4B   | ORC1         | UBE2T      | SEMA3A   |        |
| CDCA7    | FANCI    | LAT       | ORC6         | UCHL1      | SFXN1    |        |
| CDCA8    | FARSB    | LDHA      | OXCT1        | UHRF1      | SFXN4    |        |
| CDK1     | FASN     | LEPREL1   | OXR1         | UNG        | SGOL1    |        |
| CDT1     | FEN1     | LGALS2    | PA2G4        | USP18      |          |        |

## Supplementary Table 2

NFATc1 dependent genes among 465 RANKL-induced and I-BET suppressed genes

|            |         |
|------------|---------|
| ITGB3      | DPP4    |
| SLC9B2     | TMEM158 |
| F2R        | CDCA5   |
| RAB38      | TKK     |
| EXT1       | TK1     |
| SULT1B1    | ILDR1   |
| SPHK1      | FOSL1   |
| TFRC       | PRIM1   |
| PPARGC1B   | CENPH   |
| SEMA3A     | RNF208  |
| MYO1B      | HELLS   |
| TSPAN7     | CENPK   |
| FAM134B    | MCM3    |
| POLR3K     | CDCA7   |
| NRIP3      | COL18A1 |
| PLEKHF1    | RFC3    |
| SHANK3     | DTL     |
| CD109      | ELOVL6  |
| IL15RA     | EXO1    |
| PRKCH      | PTK2    |
| SFXN4      | COL6A2  |
| F5         | KIF23   |
| HSPG2      | TPX2    |
| RGS16      | HSPH1   |
| TYMS       | POLE2   |
| LGALS2     | BUB1    |
| RAI14      | SGOL1   |
| FN1        | MCM4    |
| RBFOX2     | SHCBP1  |
| HTRA3      | DNA2    |
| OXR1       | TIPIN   |
| LIF        | ANLN    |
| OXCT1      | SPAG5   |
| FJX1       | MLLT11  |
| FOSL2      | CCND1   |
| ENO3       | BYSL    |
| ST6GALNAC4 | KIF2C   |
| MRPL3      | TRIP13  |
| CKB        | CEP55   |
| POLR1A     | UHRF1   |
| NOV        | RRAD    |
| BCAR1      | MCM7    |
| GMPR       | GRPR    |
| NDUFS8     | MRPL1   |
| CSPG4      | HMMR    |
| CCL7       | TGFB3   |
| WWC1       | MCM2    |
| SIX5       | UBE2C   |
| TXLNB      | MPP6    |
| CHEK1      | FANCI   |
| MTHFD1     | SCML2   |
| SKA1       | SPC25   |
| CDC6       | NCAPG   |
| MND1       | PLK4    |
| IL7R       | MYC     |
| FANCA      | MKI67   |
| CDC20      | KIF11   |
| CCNE2      | SPARC   |
| RAD51      | PRC1    |
| BRCA1      |         |
| MELK       |         |

### Supplementary Table 3

A list of primers used in this study:

| Gene Symbol   | Sequence                                            |
|---------------|-----------------------------------------------------|
| <i>NFATC1</i> | CTTCTTCCAGTATTCCACCTAT<br>TTGCCCTAATTACCTGTTGAAG    |
| <i>MYC</i>    | GTGCATCGACCCCTCGGTGG<br>TTGCGAGGCGCAGGACTTGG        |
| <i>BCL6</i>   | CCTCGCCAGCCACAAGACCG<br>CTGGCTCCGCAGGTTTCGCA        |
| <i>IRF8</i>   | TGCGCTCCAACTCATTCTCGTG<br>GTCTGGCGGCGGCTCCTC        |
| <i>MAFB</i>   | CTCAGCACTCCGTGTAGCTC<br>GTAGTTGCTCGCCATCCAGT        |
| <i>CTSK</i>   | CTCTTCCATTTCTTCCACGAT<br>ACA CCA ACT CCC TTC CAA AG |
| <i>ITGB3</i>  | GGAAGAACGCGCCAGAGCAAATG<br>CCCCAAATCCCTCCCCACAAATAC |
| <i>Nfatc1</i> | CCCGTCACATTCTGGTCCAT<br>CAAGTAACCGTGTAGCTCCACAA     |
| <i>Myc</i>    | GCCGATCAGCTGGAGATGA<br>GTCGTCAGGATCGCAGATGAAG       |
| <i>Ctsk</i>   | AAGATATTGGTGGCTTTGG<br>ATCGCTGCGTCCCTCT             |
| <i>Itgb3</i>  | CCGGGGGACTTAATGAGACCACTT<br>ACGCCCCAAATCCCACCCATACA |
| <i>Cxcl1</i>  | GGTGTCCCCAAGTAACGGAG<br>TTGTCAGAAGCCAGCGTTCA        |
| <i>Cxcl2</i>  | TGCAGTCGGATGGCTTTCAT<br>GCACTGTGCCTTACGAGGAA        |
| <i>Il1b</i>   | CAACCAACAAGTGATATTCTCCATG<br>GATCCACACTCTCCAGCTGCA  |

|                 |                                              |
|-----------------|----------------------------------------------|
| NFATC1 promoter | CCAGTGAAGCGCTTTTCCAA<br>CCGGCATGCTGAAGTCATTA |
|-----------------|----------------------------------------------|

## Supplementary Methods

**Analysis of bone phenotype.** To measure bone mineralization in the OVX model, mice were intraperitoneally injected with Calcein (green) at  $10 \mu\text{g g}^{-1}$  (body weight) twice, 7 days apart. Two days after the second injection, femurs were collected, fixed in 80% ethanol, embedded in poly(methyl methacrylate) as described previously<sup>1</sup>, and then cut into 8–10  $\mu\text{m}$  sections. Histomorphometry analysis using OsteoII software (Bioquant, Nashville, TN) was performed on trabecular bone within the femoral metaphysis. Mineral apposition rate (MAR) was determined by measuring the distance between two fluorochrome-labeled mineralization fronts. The mineralizing surface was determined by measuring the double labeled surface and one-half of single labeled surface, and by then expressing this value as a percentage of total bone surface. The Bone Formation Rate (BFR) was then expressed as  $\text{MAR} \times \text{mineralizing surface}/\text{total bone surface}$ , using a surface referent.

**Osteoblast differentiation analysis.** Primary osteoblast precursors were isolated from calvaria of wild type mice by using the digestion solution containing type I collagenase and dispase II (Invitrogen). Cells were cultured with  $\alpha$ -MEM containing 10% FBS, 50  $\mu\text{g}/\text{ml}$  of ascorbic acid, and 8 mM beta-glycerophosphate. For osteoblast marker gene expression, total mRNA was purified from osteoblast cultures at day 10. Osteoblasts were stained with Alizarin Red after 21 days of culture and Alizarin Red staining was quantified by colorimetric analysis at  $\text{OD}_{405}$ .

## Supplementary References

1. Erben, R.G. Embedding of bone samples in methylmethacrylate: an improved method suitable for bone histomorphometry, histochemistry, and immunohistochemistry. *J Histochem Cytochem* **45**, 307-313 (1997).
2. Charles, J.F., *et al.* The collection of NFATc1-dependent transcripts in the osteoclast includes numerous genes non-essential to physiologic bone resorption. *Bone* **51**, 902-912 (2012).
